# Supplementary material for: Combinatorial suicide gene strategies for the safety of cell therapies
Source: PubMed Central journal article supplement (PMC9515659; doi:10.3389/fimmu.2022.975233), 2022-09-14
Supplement: DataSheet_1.pdf [file DataSheet_1.pdf]

## DNA and AMINO ACID SEQUENCES

>F36V-ΔCaspase8-P2A-GFP

ATGCTCGAGGGAGTGCAGGTGAAACCATCTCCCAGGAGACGGGCGCACCTTCCCAAGCGCGGCCAGACCTG  
CGTGGTGCCTACACCGGGATGCTTGAAGATGGAAAGAAAGTTGATTCTCCCGGGACAGAAACAAGCCCTTAA  
GTTTATGCTAGGCAAGCAGGAGGTGATCCGAGGCTGGGAAGAAGGGGTTGCCAGATGAGTGTGGGTGAGAGA  
GCCAACTGACTATATCTCCAGATTATGCCTATGGTGCCACTGGGCACCCAGGCATCATCCCACCACATGCCACTCT  
CGTCTTCGATGTGGAGCTTCTAAAACCTGGAATCTGGCGGTGGATCCacaatctcgactctcaagagaacaggatagtgaaat  
acagactttggacaaagtaccacaaatgaaaagcaaacctcggggatactgtctgatcatcaacaatcacaattttgaaaagcacgggagaaagtg  
cccaaacctcacagcattaggacaggaatggaacacactggatgcaggggcttgaccacgaccttgaagagcttcattttgagatcaagcccc  
cgtgactgcacagtagagcaaatctatgagattttgaaaactaccaactcatggaccacagtaacatggactgcttcatctgctgtatcctctccat  
ggagacaaggcatcatctatggactgatggacaggagggccccatctatgactgacatctcagttcactggttgaagtgccttcccttctgctgga  
aaacccaaagtgtttttattcaggcttgcaggggataactaccagaaaggtatactgttgagactgattcagaggagcaacccatttagaagt  
gatttatcatcacctcaaacgagatatacccggatgaggtgactttctgctggggatggccactgtgaataactgttttctaccgaaacccctgcag  
agggaacctggtacatccagtcactttgccagagcctgagagagcgtatctctcagggcgtgatatttccacatcctgactgaagtgaactatgaa  
gtaagcaacaaggatgacaagaaaaacatggggaacagatgcctcagcctactttcacactaagaaaaaactgtcttcccttctgatagcgtG  
CAACAACTTCTCACTACTCAAACAAGCAGGTGACGTGGAGGAGAATCCCGGGCCTAACATGGTGAAGGCAAGGGC  
GAGGAGCTGTTCACCGGGGTGGTGCCATCCTGGTCGAGCTGGACGGCGACGTAACGGCCACAAGTTCAGCGT  
GTCCGGCGAGGGCGAGGGCGATGCCACCTACGGCAAGCTGACCCTGAAGTTCATCTGCACCACCGGCAAGCTGC  
CCGTGCCCTGGCCACCCTCGTGACCACCTGACCTACGGCGTGCAGTGCTCAGCCGCTACCCCGACCACATGAA  
GCAGCAGACTTCTTCAAGTCCGCCATGCCGAAGGCTACGTCCAGGAGCGCACCATCTTCTTCAAGGACGACGG  
CAACTACAAGACCCGCGCGGAGGTGAAGTTCGAGGGCGACACCCTGGTGAACCGCATCGAGCTGAAGGGCATCG  
ACTTCAAGGAGGACGGCAACATCCTGGGGCACAAGCTGGAGTACAACACTACAACAGCCACAACGTCTATATCATGG  
CCGACAAGCAGAAGAACGGCATCAAGGTGAAGTTCGAGGGCGACACCCTGGTGAACCGCATCGAGCTGAAGGGCATCG  
GCCGACCACTACCAGCAGAACACCCCATCGGCGACGGCCCCGTGCTGCTGCCGACAACCACTACCTGAGCACCC  
AGTCCGCCCTGAGCAAAGACCCCAACGAGAAGCGCGATCACATGGTCTGCTGGAGTTCGTGACCGCCGCCGGG  
ATCACTCTCGGCATGGACGAGCTGTACAAGTAA

MLEGVQVETISPGDGRTPKRGQTCVVHYTGMLEDGKKVDSSRDRNPKFKMLGKQEVIRGWEEGVAQMSVGRQRA  
KLTISPDYAYGATGHPGIIPPHATLVFDVELLKLESGGGSTISDSPREQDSESTLQDKVYQMKSKPRGYCLIINHNHFAKAR  
EKVPLHSDRNRNGTHLDAGALTTTFFELHFEIKPHDDCTVEQIYEILKIYQLMDHSNMDFICCLSHGDKGIIYGTGQDE  
APIYELTSQFTGLKCPSLAGKPKVFFIQACQGDNYQKIPVETDSEEQPYLEM DLSSPQTRYIPDEADFLGMATVNNCV  
SYRNP AEGTWYIQSLCQSLRERCPRGDDILTILTEVNYEVS NKDDKKNMGKQMPQPTFLRKKLVFSPDSAATNFSLLK  
QAGDVEENPGPNMVSKGEELFTGVVPILVELDGDVNGHKFSVSGEGEDATYGLTLKFICTTGKLPVPWPTLVTTLY  
GVQCFSRYPDHMKQHDFK SAMPEGYVQERTIFFKDDGNYKTRAEVKFEGDTLVNRIELKIDFKEDGNILGHKLEYNY  
NSHNVYIMADKQKNGIKVNFKIRHNIEDGSVQLADHYQQNTPIGDGPVLLPDNHYLSTQSALS KDPNEKRDMVLLF  
VTAAGITLGMDELYK\*

>F36V-ΔCaspase9-T2A-ΔCD19

ATGCTCGAGGGAGTGCAGGTGAAACCATCTCCCAGGAGACGGGCGCACCTTCCCAAGCGCGGCCAGACCTG  
CGTGGTGCCTACACCGGGATGCTTGAAGATGGAAAGAAAGTTGATTCTCCCGGGACAGAAACAAGCCCTTAA  
GTTTATGCTAGGCAAGCAGGAGGTGATCCGAGGCTGGGAAGAAGGGGTTGCCAGATGAGTGTGGGTGAGAGA  
GCCAACTGACTATATCTCCAGATTATGCCTATGGTGCCACTGGGCACCCAGGCATCATCCCACCACATGCCACTCT  
CGTCTTCGATGTGGAGCTTCTAAAACCTGGAATCTGGCGGTGGATCCGGAGTCGACGGATTTGGTGTATGCGGTGC  
TCTTGAGAGTTTGGAGGGAAATGCAGATTTGGCTTACATCCTGAGCATGGAGCCCTGTGGCCACTGCCTCATTATC

ACAATGTGAACCTTCTGCCGTGAGTCCGGGCTCCGCACCCGCACTGGCTCCAACATCGACTGTGAGAAGTTGCGG  
CGTCGCTTCTCCTCGCTGCATTTATGGTGGAGGTGAAGGGCGACCTGACTGCCAAGAAAATGGTGCTGGCTTTGC  
TGGAGCTGGCGCAGCAGGACCACGGTGTCTGGACTGCTGCGTGGTGGTATTCTCTCACGGCTGTCAGGCCA  
GCCACCTGCAGTTCCAGGGGCTGTCTACGGCACAGATGGATGCCCTGTGTGGTTCGAGAAGATTGTGAACATCT  
TCAATGGGACCAGCTGCCCCAGCCTGGGAGGGAAGCCCAAGCTCTTTTTATCCAGGCCTGTGGTGGGGAGCAGA  
AAGACCATGGGTTTGAGGTGGCCTCCACTTCCCCTGAAGACGAGTCCCCTGGCAGTAACCCCGAGCCAGATGCCA  
CCCCGTTCCAGGAAGTTTGAGGACCTTCGACCAGCTGGACGCCATATCTAGTTTGGCCACACCCAGTGACATCTT  
TGTGTCTACTCTACTTTCCAGGTTTTGTTTCTGGAGGGACCCCAAGAGTGGCTCCTGGTACGTTGAGACCTGG  
ACGACATCTTTGAGCAGTGGGCTCACTCTGAAGACCTGCAGTCCCTCCTGCTTAGGGTCGTAATGCTGTTTCGGT  
GAAAGGGATTATAAACAGATGCCTGGTTGCTTTAATTTCTCCGAAAAAACTTTTCTTAAAACATCAGCTAGCA  
GAGCCGAGGGCAGGGGAAGTCTTAAACATGCGGGGACGTGGAGGAAAATCCCGGGCCCATGCCACCTCCTCGC  
CTCCTCTTCTCCTCCTCCTCACCCCATGGAAGTCAGGCCCGAGGAACCTCTAGTGGTGAAGGTGGAAGAGG  
GAGATAACGCTGTGCTGCAGTGCCTCAAGGGGACCTCAGATGGCCCCACTCAGCAGCTGACCTGGTCTCGGGAGT  
CCCCGCTTAAACCTTCTTAAAACCTCAGCCTGGGGCTGCCAGGCCTGGGAATCCACATGAGGCCCTGGCCATCTG  
GCTTTTCTTCAACGTCTCTCAACAGATGGGGGCTTCTACCTGTGCCAGCCGGGGCCCCCTCTGAGAAGGCC  
TGGCAGCCTGGCTGGACAGTCAATGTGGAGGGCAGCGGGGAGCTGTTCCGGTGAATGTTTCGGACCTAGGTGG  
CCTGGGCTGTGGCCTGAAGAACAGGTCTCAGAGGGCCCCAGCTCCCCTCCGGGAAGCTCATGAGCCCCAAGCT  
GTATGTGTGGGCCAAAGACCGCCCTGAGATCTGGGAGGGAGAGCCTCCGTGTCTCCACCGAGGGACAGCCTGA  
ACCAGAGCCTCAGCCAGGACCTACCATGGCCCCCTGGCTCCACACTCTGGCTGTCTGTGGGGTACCCCTGACTC  
TGTGTCCAGGGGCCCCCTCCTGGACCATGTGCACCCCAAGGGCCTAAGTCATTGCTGAGCCTAGAGCTGAA  
GGACGATCGCCCGCCAGAGATATGTGGGTAATGGAGACGGGTCTGTTGTTGCCCGGGCCACAGCTCAAGACG  
CTGGAAAGTATTATTGTCACCGTGGCAACCTGACCATGTCATTCCACCTGGAGATCACTGCTCGGCCAGTACTATG  
GCACTGGCTGCTGAGGACTGGTGGCTGGAAGGTCTCAGCTGTGACTTTGGCTTATCTGATCTTCTGCCTGTGTTCC  
CTTGTGGGCATTCTTCACTTCAAAGAGCCCTGGTCTGAGGAGGAAAAGAAAGCGAATGACTGACCCACCAGG  
AGATTCTAA

MLEGVQVETISPGDGRTPFKRGQTCVVHYTGMLDGGKVDSSRDNRNPKFKMLGKQEVIRGWEEGVAQMSVQRA  
KLTISPDYAYGATGHPGIIPPHATLVFDVELLKLESGGGSGVDGFGDVGALSLRGNADLAYILSMPECGHCLIIINNVFC  
RESGLRTRTGSNIDCEKLRFRFSSLFHMVEVKGDLTAKKMLLALLELAQQDHGALDCCVVVILSHGCCQASHLQFPNAVY  
GTDGCPVSVKIVNIFNGTSCPSLGGKPKLFFIQACGGEQKDHGFVASTSPEDESPPGSNPEPDATPFQEGLRFDQLDA  
ISSLPTSDIFVSYSTFPFVSWRDPKSGSWYVETLDDIFEQWAHSEDLQSLLRVANAVSVKGIYKQMPGCFNLRKLL  
FFKTSASRAEGRGSLTCDGVEENPGMPMPPLRLLFFLLFLTPMEVRPEEPLVVKVEEGDNAVLQCLKGTSDGPTQQLTW  
SRESPLKPKLKLGLPLGLIHMRLAIWLFIFNVSQQMGGFYLCQPGPSEKAWQPGWTVNVEGSGELFRWNVSDLG  
GLGCGLKNRSSEGPSSPSGKLMSPKLYVWAKDRPEIWEGEPPCLPPRDSLNLQSLSQDLTMAPGSTLWLSCGVPPDSVS  
RGPLSWTHVHPKPKSLLSLELKDDRPARDMWVWVETGLLLPRATAQDAGKYYCHRGNLTMSEHLEITARPVLWHWL  
LRTGGWKVSAVTLAYLIFCLCSLVGILHLQRALVLRKRKRMTDPTRRF\*

> F36V-ΔCaspase9-T2A-RQR8-I-GFP

ATGCTCGAGGGAGTGCAGGTGGAACCATCTCCCCAGGAGACGGGCGCACCTTCCCCAAGCGCGGCCAGACCTG  
CGTGGTGCCTACACCGGGATGCTTGAAGATGGAAGAAAGTTGATTCTCCCGGGACAGAAACAAGCCCTTAA  
GTTTATGCTAGGCAAGCAGGAGGTGATCCGAGGCTGGGAAGAAGGGGTTGCCAGATGAGTGTGGGTGAGAGA  
GCCAAACTGACTATATCTCCAGATTATGCCTATGGTGCCTACTGGGCACCCAGGCATCATCCACCACATGCCACTCT  
CGTCTTCGATGTGGAGCTTCTAAAACCTGGAATCTGGCGGTGGATCCGGAGTCGACGGATTTGGTGTGTCGGTGC  
TCTTGAGAGTTTGAGGGGAAATGCAGATTTGGCTTACATCCTGAGCATGGAGCCCTGTGGCCACTGCCTCATTATC  
ACAATGTGAACCTTCTGCCGTGAGTCCGGGCTCCGCACCCGCACTGGCTCCAACATCGACTGTGAGAAGTTGCGG

CGTCGCTTCTCCTCGCTGCATTTTCATGGTGGAGGTGAAGGGCGACCTGACTGCCAAGAAAATGGTGCTGGCTTTGC  
TGGAGCTGGCGCAGCAGGACCACGGTCTGCTGACTGCTGCGTGGTGCATTCTCTCACGGCTGTCAGGCCA  
GCCACCTGCAGTTCCAGGGGCTGTCTACGGCACAGATGGATGCCCTGTGTCGGTCGAGAAGATTGTGAACATCT  
TCAATGGGACCAGCTGCCCCAGCCTGGGAGGGAAGCCCAAGCTCTTTTTTCATCCAGGCCTGTGGTGGGGAGCAGA  
AAGACCATGGGTTTGGAGGTGGCCTCCAATTCCCCTGAAGACGAGTCCCCTGGCAGTAACCCCGAGCCAGATGCCA  
CCCCGTTCCAGGAAGGTTTGGAGACCTTCGACCAGCTGGACGCCATATCTAGTTTGGCCACACCCAGTGACATCTT  
TGTGTCTACTCTACTTTCCAGGTTTTGTTTCTGGAGGGACCCCAAGAGTGGCTCCTGGTACGTTGAGACCCTGG  
ACGACATCTTTGAGCAGTGGGCTCACTCTGAAGACCTGCAGTCCCTCCTGCTTAGGGTCGCTAATGCTGTTTCGGT  
GAAAGGGATTTATAAACAGATGCCTGGTTGCTTTAATTTCCCTCCGAAAAAACTTTTTCTTTAAAACATCAGCTAGCA  
GAGCCGAGGGCAGGGGAAGTCTTAAACATGCGGGGACGTGGAGGAAAATCCCGGGCCCATGGGCACCAGCCT  
GCTGTGCTGGATGGCCCTGTGCCTGCTGGGCGCCGACCACGCCGATGCCTGCCCTACAGCAACCCAGCCTGTG  
CAGCGGAGGGCGGCGCAGCGAGCTGCCACCCAGGGCACCTTCTCCAACGTGTCCACCAACGTGAGCCCAGCCAA  
GCCACACCACCGCCTGTCTTATTCCAATCCTTCCCTGTGTAGCGGAGGGGGAGGCAGCCCAGCCCCAGACCT  
CCCACCCAGCCCCACCATCGCCAGCCAGCCTCTGAGCCTGAGACCCGAGGCCTGCCGCCAGCCGCCGGCGGC  
GCCGTGCACACCAGAGGCCTGGATTTGCCTGCGATATCTACATCTGGGCCCCACTGGCCGGCACCTGTGGCGTG  
CTGCTGCTGAGCCTGGTGATCACCTGTAAGTGCACACCAGCGCAACCGCAGGGCGCGTGTGCAAGTCCCCAGGCC  
GTGGTGTGAACGCGTACGTCGCGACCGCGGACATGTACAGAGCTCGAGCGGGATCAATTCGCCCCCCCTAAC  
GTTACTGGCCGAAGCCGCTTGAATAAGGCCGGTGTGCGTTTGTCTATATGTTATTTCCACCATATTGCCGTCTTT  
TGGAATGTGAGGGCCCGAAACCTGGCCCTGTCTTCTGACGAGCATTCTAGGGGTCTTCCCTCTCGCCAAA  
GGAATGCAAGGTCTGTTGAATGTCGTGAAGGAAGCAGTTCCTCTGGAAGCTTCTGAAGACAAACAACGTCTGTA  
GCGACCCTTTCAGGCAGCGGAACCCCCACCTGGCGACAGGTGCCTCTGCGGCCAAAAGCCACGTGTATAAGAT  
ACACCTGCAAAGGCGGCACAACCCAGTGCCACGTTGTGAGTTGGATAGTTGTGGAAGAGTCAAATGGCTCTCC  
TCAAGCGTATTCAACAAGGGGCTGAAGGATGCCAGAAGGTACCCATTGTATGGGATCTGATCTGGGGCCTCGG  
TGCACATGCTTTACATGTGTTTAGTTCGAGGTTAAAAACGTCTAGGCCCCCGAACACGGGGACGTGGTTTTCT  
TTGAAAAACAGATAATAATATGGTGAAGGCGAGGAGCTGTTACCGGGGTGGTGGCCATCCTGGTGCAG  
CTGGACGGCGACGTAAACGGCCACAAGTTCAGCGTGTCCGGCGAGGGCGAGGGCGATGCCACCTACGGCAAGCT  
GACCCTGAAGTTCATCTGCACCACCGCAAGCTGCCGTGCCCTGGCCACCCTCGTGACCACCTGACCTACGGC  
GTGCAGTGCTTACGCCCTACCCCGACCACATGAAGCAGCACGACTTCTTCAAGTCCGCCATGCCCGAAGGCTACG  
TCCAGGAGCGCACCATCTTCTTCAAGGACGACGGCAACTACAAGACCCGCGCCGAGGTGAAGTTCGAGGGCGAC  
ACCCTGGTGAACCGCATCGAGCTGAAGGGCATCGACTTCAAGGAGGACGGCAACATCCTGGGGCACAAGCTGGA  
GTACAACACTACAACAGCCACAACGTCTATATCATGGCCACAAGCAGAAGAACGGCATCAAGGTGAACTTCAAGAT  
CCGCCACAACATCGAGGACGGCAGCGTGCAGCTCGCCGACCACTACCAGCAGAACACCCCATCGGCGACGGCCC  
CGTGCTGCTGCCGACAACCACTACCTGAGCACCCAGTCCGCCCTGAGCAAAGACCCCAACGAGAAGCGCGATCA  
CATGGTCTGCTGGAGTTCGTGACCGCCCGGGGATCACTCTCGGCATGGACGAGCTGTACAAGTAA

MLEGVQVETISPGDGRTPFKRGQTCVVHYTGMLDGGKVDSSRDRNPKFKMLGKQEVIRGWEEGVAQMSVQRA  
KLTISPDYAYGATGHPGIIPPHATLVFDVELLKLESAGGGSGVDGFGDVGALSLRGNADLAYILSMPCGHCLINNVNFC  
RESGLRTRTGSNIDCEKLRFRSSLFHMVEVKGDLTAKKMLLALLELAQQDHGALDCCVVVILSHGCCQASHLQFPNAVY  
GTDGCPVSVKIVNIFNGTSCPSLGGKPKLFFIQACGGEQKDHGFVASTSPEDESPGSNPEPDATPFQEGLRTFDQLDA  
ISSLPTPSDIFVSYSTFPFVSWRDPKSGSWYVETLDDIFEQWAHSEDLQSLLRVANAVSVKGIYKQMPGCFNLRKLL  
FFKTSASRAEGRGSLTCDGVEENPGPMGTSLLCWMALCLLADHADACPYSNPSLCSGGGGSELPTQGTFSNVSTNV  
SPAKPTTACPYSNPSLCSGGGGSPAPRPPTPAPTIASQPLSLRPEACRPAAGGAVHTRGLDFACDIYIWAPLAGTCGLV  
LLSLVITLYCNHRNRRRVCKCPRPVV\*

MVSKGEELFTGVVPIVELDGDVNGHKFSVSGEGEDATYKLTLLKFICTTGKLPVPWPTLVTTLTLYGVQCFSRYPDHM  
KQHDFFKSAMPEGYVQERTIFFKDDGNYKTRAEVKFEGDTLVNRIELKIDFKEDGNILGHKLEYNYNSHNVYIMADKQ

KNGIKVNFKIRHNIEDGSVQLADHYQQNTPIGDGPVLLPDNHYLSTQSALS KDPNEKRDHMLLEFVTAAGITLGMDEL  
YK\*

>RQR8-I-GFP

ATGGGCACCAGCCTGCTGTGCTGGATGGCCCTGTGCCTGCTGGGCGCCGACCACGCCGATGCCTGCCCTACAGC  
AACCCAGCCTGTGCAGCGGAGGCGGCGGAGCGAGCTGCCACCCAGGGCACCTTCTCCAACGTGTCCACCAAC  
GTGAGCCCAGCCAAGCCCACCACCACCGCCTGTCTTATTCCAATCCTTCCCTGTGTAGCGGAGGGGGAGGCAGCC  
CAGCCCCAGACCTCCCACCCAGCCCCACCATCGCCAGCCAGCCTCTGAGCCTGAGACCCGAGGCCTGCCGCC  
AGCCGCCGCGGCGCCGTGCACACCAGAGGCCTGGATTTGCGCTGCGATATCTACATCTGGGCCCCACTGGCCGG  
CACCTGTGGCGTGCTGCTGCTGAGCCTGGTGATCACCTGTACTGCAACCACCGCAACCGCAGGCGCGTGTGCAA  
GTGCCCCAGGCCCGTGGTGTGAACGCGTACGTCGCGACCGCGGACATGTACAGAGCTCGAGCGGGATCAATTCC  
GCCCCCCCCCTAACGTTACTGGCCGAAGCCGCTTGAATAAGGCCGGTGTGCGTTTGTCTATATGTTATTTCCACC  
ATATTGCCGTCTTTTGGCAATGTGAGGGCCGGAAACCTGGCCCTGTCTTCTTGACGAGATTCTAGGGGTCTTT  
CCCCTCTCGCCAAAGGAATGCAAGGTCTGTTGAATGTCGTGAAGGAAGCAGTTCCTCTGGAAGCTTCTGAAGAC  
AAACAACGTCTGTAGCGACCCTTTCAGGCAGCGGAACCCCCACCTGGCGACAGGTGCCTCTGCGGCCAAAAGC  
CACGTGTATAAGATACACCTGCAAAGGCGGCACAACCCCACTGCCACGTTGTGAGTTGGATAGTTGTGGAAAGAG  
TCAAATGGCTCTCCTCAAGCGTATTCAACAAGGGGCTGAAGGATGCCAGAAGGTACCCATTGTATGGGATCTG  
ATCTGGGGCCTCGGTGCACATGCTTTACATGTGTTTAGTCGAGGTTAAAAACGTCTAGGCCCCCCGAACCACGGG  
GACGTGGTTTTCTTTGAAAAACACGATAATAATATGGTGAGCAAGGGCGAGGAGCTGTTACCGGGGTGGTGCC  
CATCCTGGTCGAGCTGGACGGCGACGTAAACGGCCACAAGTTCAGCGTGTCCGGCGAGGGCGAGGGCGATGCCA  
CCTACGGCAAGCTGACCCTGAAGTTCATCTGCACCACCGCAAGCTGCCCGTGCCTGGCCACCCTCGTGACCAC  
CCTGACCTACGGCGTGCACTGCTTCAGCCGCTACCCCGACCACATGAAGCAGCACGACTTCTTCAAGTCCGCCATG  
CCCGAAGGCTACGTCCAGGAGCGCACCATCTTCTTCAAGGACGACGGCAACTACAAGACCCGCGCCGAGGTGAAG  
TTCGAGGGCGACACCCTGGTGAACCGCATCGAGCTGAAGGGCATCGACTTCAAGGAGGACGGCAACATCCTGGG  
GCACAAGCTGGAGTACAACACTACAACAGCCACAACGTCTATATCATGGCCGACAAGCAGAAGAACGGCATCAAGGT  
GAACTTCAAGATCCGCCACAACATCGAGGACGGCAGCGTGCAGCTCGCCGACCACTACCAGCAGAACCCCCAT  
CGGCGACGGCCCCGTGCTGCTGCCGACAACCACTACCTGAGCACCCAGTCCGCCCTGAGCAAAGACCCCAACGA  
GAAGCGGATCACATGGTCTGCTGGAGTTCGTGACCGCCGCCGGGATCACTCTCGGCATGGACGAGCTGTACAA  
GTAA

MGTSLLCWMALCLLGADHADACPYSNPSLCSGGGGSELPTQGTFSNVSTNVSPAKPTTTACPYSNPSLCSGGGGSPAP  
RPPTPAPTIASQPLSLRPEACRPAAGGAVHTRGLDFACDIYIWAPLAGTCGVLLLSLVITLYCNHRNRRRVCKCPRPVV\*  
MVSKEELFTGVVPIVELDGDVNGHKFSVSGEGEGDATYGLTLKFICTTGKLPVPWPTLVTTLYGVQCFSRYPDHM  
KQHDFFKSAMPEGYVQERTIFFKDDGNYKTRAEVKFEGDTLVNRIELKGIDFKEDGNILGHKLEYNYNSHNVYIMADKQ  
KNGIKVNFKIRHNIEDGSVQLADHYQQNTPIGDGPVLLPDNHYLSTQSALS KDPNEKRDHMLLEFVTAAGITLGMDEL  
YK\*

>FKBP-L-FRB-L-ΔCaspase9-T2A-ΔCD19

atggtgggagtgagggtgaaacctctccccaggagacgggcgacactccccaagcgcggccagacctgcgtggtgactacaccgggatgcttg  
aagatggaagaaatgattctccgggacagaaacaagcccttaagttatgtaggcaagcaggaggtgatccgaggctgggaagaagggg

ttgccagatgagtggtgagagccaaactgactatatactccagattatgcctatggtgccactgggcacccaggcatcatcccacacatgcc  
ctctcgtctcgatgtggagcttctaaaactggaaggggatctggcggtatctctggcatgagatgtggcatgaaggcctggaagaggcatctcgtt  
tgtactttgggaaaggaacgtgaaaggcatgtttgaggtgctggagccctgcatgctatgatggaacggggcccccagactctgaaggaaacatcc  
ttaatcaggcctatggtcgagatttaattggaggcccaagagtgtgaggaagtaacatgaaatcagggaatgtcaaggacctcacccaagcctggg  
acctctattatcatgtgtccgacgaatctcaaagtctggcggtggatccggagtcgacggatttggtgatgtcggctcttgagagtttgaggggaaa  
tgagatttgcttacatcctgagcatggagccctgtggcactgcctcattacaacaatgtgaactctgacctgagtcgggctccgcacccgcact  
ggctccaacatcgactgtgagaagttgcggtcgtcttctcctcgtgcatttcatggtggaggtgaaggcgacactgactgccaagaaaatggtgctg  
gctttgctggagctggcgagcaggaccgggtgctctggactgctgctggtggtcattctctcacggctgacggccagccacctgcagttcccag  
gggctgtctacggcacagatggatgacctgtcggctcagagaagattgtgaacatctcaatgggaccagctgccccagcctgggaggggaagccaa  
gctcttttcatccaggcctgtggtggggagcagaaagaccatgggttgaggtggcctccactcccctgaagacgagctcccctggcagtaacccga  
gccagatgccacccgttccaggaaggttgaggaccttcgaccagctggacgccaatctagtttcccacacccagtgacatctttgtgtcctactct  
actttcccaggtttgttctggaggaccacaagagtggctcctggtacgttgagaccctggacgacatctttgagcagtgaggctcactctgaagacc  
tgagctccctccttagggtcgtaatgctgtttcgggtgaaagggattataaacagatgacctggttcttaattctccgaaaaaacttttctta  
aaacatcagctagcagagccgagggcaggggaagtcttcaacatgcggggacgtggaggaaaaatcccgggcccacacccctcctgcctcctctt  
cttctcctctcctcaccctcatggaagttagggccgaggaacctctagtggtgaaggtggaagagggagataacgctgtgctgagctcctcaagg  
ggacctcagatggccccactcagcagctgacctggtctcgggagctccccgttaaaccttcttaaaactcagcctggggctgcccaggcctgggaatcc  
acatgaggcccctggcactctggctttcatctcaacgtctctcaacagatggggggcttctacctgtccagccggggcccccctctgagaaggcctg  
gcagcctggctggacagtaatgtggagggcagcggggagctgttccgggtggaatgtttcggacctaggtggcctgggctggtggaagaacagg  
tctcagagggccccagctcccctccgggaagctcatgagcccaagctgtatgtgtgggccaagaccgacctgagatctgggagggagagcctcc  
gtgtctcccacggaggacagcctgaaccagagcctcagccaggacctcaccatggcccctggctccacactctggctgtcctgtggggtaccccctg  
actctgtgtccagggccccctcctcctggacctatgtcaccccaagggcctaagtattgctgagcctagagctgaaggacatgcccggccaga  
gatatgtgggtaatggagacgggtctgtttgccccgggcccacagctcaagacgctggaagattattgtcacctggcaacctgacctgctcattc  
cacctggagatcactgctcggccagctactatggcactggctgctgaggactggtggctggaaggtctcagctgtgactttggcttatctgctctgct  
gtgttcccttgggcattctctcaatgagccctggtcctgaggaggaagaaagcaatgactgacccaccaggagattctaa

MVG VQVETISPGDGRTPFKRGQTCVVHYTGMLEDGKKFDSSRDRNKPFKMLGKQEVIRGWEEGVAQMSVGQRAK  
LTISPDYAYGATGHPGIIPPHATLVFDVELLKLGGSSGILWHEMWHEGLEEASRLYFGERNVKGMFEVLEPLHAMME  
RGPQTLKETSNQAYGRDLMEAQEWCRKYMKSGNVKDLTQAWDLYYHVFRISKSGGGSGVDGFGDVGALSLRGN  
ADLAYILSMPCGHCLIIINNVNFCRESGLRTRTGSNIDCEKLRFRSSLFHFMVEVKGDLTAKKMLLALLELAQQDHGALD  
CCVVVILSHGCQASHLQFPGAVYGTGCPVSVEKIVNIFNGTSCPSLGGKPKLFFIQACGGEQKDHGFVASTSPEDESP  
GSNPEPDATPFQEGLRFTDQLDAISSLPTPSDIFVSYSTFPGFVSWRDPKSGSWYVETLDDIFEQWAHSEDLQSLLRVA  
NAVSVKGIYKQMPGCFNFRKLLFFKTSASRAEGRGSLTCDGVEENPGPMPPRLLFFLLFTPMEVRPEEPLVVKVEE  
GDNAVLQCLKGTSDGPTQQLTWSRESPLKPLKLSLGLPGLIHMRLAIWLFIFNVSQMGGFYLCQPGPPSEKAWQ  
PGWTVNVEGSGELFRWNVSDLGLGCGLKNRSSEGPSSPSGKLMSPKLYVWAKDRPEIWEGEPPCLPPRDSL NQSL  
QDLTMAPGSTLWLSCGVPPDSVSRGPLSWTHVHPKGPKLLSLELKDDRPARDMWMVETGLLLPRATAQDAGKYC  
HRGNLTMSFHLEITARPVLWHWLLRTGGWKVSAVTLAYLIFCLCSLVGILHLQRALVLRKRKRMTDPTRRF\*

>F36V-ΔCaspase8-T2A-RQR8

atgctcagggaaaatcccgggcccggagtgcaggtggaaccatctcccaggagacgggcccaccttcccgaagcgcggccagacctgctggtg  
cactacaccgggatgcttgaagatggaagaaatttgattctcccgggacagaaacaagcccttaagtttatgctaggcaagcaggaggtgatccg  
aggctgggaagaaggggttcccagatgagtggtgagagccaaactgactatatactccagattatgcctatggtgccactgggcacccaggc  
atcatcccaccacatgccactctcctctgatgtggagcttctaaaactgggggatctggcggtgctccggcggcgaatcctctggcatgagatg

tggcatgaaggcctggaagaggcatctcgtttgactttggggaaaggaacgtgaaaggcatgtttgaggtgctggagcccttgcagctatgatgga  
acggggccccagactctgaaggaacatccttaatcaggcctatggtcgagatttaaggaggccaagagtgggtgcaggaagtacatgaaatca  
gggaatgtcaaggacctcctcaagcctgggaccttattatcatgtgtccgacgaatctcaaagactagttatccgtacgacgtaccagactacgca  
tctggcggatccacaatctcggactctcaagagaacaggatagtgatcacagactttggacaaagtttaccaaatgaaaagcaaacctcggg  
gatactgtctgatcatcaacaatcacaatcttgcaaaagcacgggagaaagtgcccaaactcacagcattagggacaggaatggaacacactgga  
tgaggggcttgaccacgaccttgaagagcttcatcttgatcaagccccagatgactgcacagtagagcaaactatgatgattttgaaaatcta  
ccaactcatggaccacagtaacatggactgctctatctgtgtatcctctccatggagacaaggcatcatctatggcactgatggacaggaggcccc  
catctatgagctgacatctcagttcactggttgaagtgccttcccttctgctggaaaacccaaagtgtttttattcaggctgtcagggggataactacc  
agaaaagtatactgttgagactgattcagaggagcaaccctatttagaaatggatttatcatcacctcaaacgagatatacccggatgaggctgac  
tttctgctgggatggccactgtgaataactgttttctaccgaaacctgcagagggaacctggtacatccagtactttgccagagcctgagagag  
cgatgtctcagggcgatgatattctaccatcctgactgaagtgaactatgaagtaagcaacaaggatgacaagaaaaacatggggaaacagatg  
cctcagcctactttcacactaagaaaaaactgtcttcccttctgatagcgtggaagcggagaggcaggggaagtcttctaactgcggggacgt  
ggaggaaaatcccggcccctctagaatgggcaccagcctgctgtgctggatggccctgtgctgctggcgccgaccacgccgatcctgccctaca  
gcaacccagcctgtgcagcggaggcggcggcagcagctgcccaccaggggcaccttctcaacgtgtccaccaactgagcccagccaagccca  
ccaccaccgctgtccttattccaatccttccctgtgtagcggagggggagggcagcccagccccagacctcccaccagccccaccatgccagccc  
agcctctgagcctgagacccgaggcctgcccccagcccggcgccgctgacaccagaggcctggatttcgctgcatatctacatctggcc  
ccactggccggcacctgtggcgtgctgctgctgagcctggtgatcacctgtactgcaaccaccgcaaccgagggcgctgtgcaagtccccaggcc  
cgtggtgtaa

MLEENPGPGVQVETISPGDGRTPKRGQTCVVHYTGMLLEDGKKFDSSDRNKPFFMLGKQEVIRGWEEGVAQMSV  
GQRAKLTISPDYAYGATGHPGIIPPHATLVFDVELLKLGGSGGGSGGILWHEMWHEGLEASRLYFGERNVKGMFEV  
LEPLHAMMERGPQTLKETSFNQAYGRDLMEAQEWCRKYMKSGNVKDLLQAWDLYYHVFRRISKTSYPYDVPDYASG  
GGSTISDSPREQDSESQLDKVYQMKSKPRGYCLIINNHNFARKAREKVPKLHSIRDNRNGTHLDAGALTTTFFELHFEIKPH  
DDCTVEQIYEILKIYQLMDHSNMDCFICILSHGDKGIYGTGQEAPIYELTSQFTGLKCPFLAGPKVFFIQACQGDNY  
QKGIPVETDSEEQPYLEMDLSSPQTRYIPDEADFLLGMATVNNCVSYRNP AEGTWYIQSLCQSLRERCPRGDDILTILTE  
VNYEVS NKDDKKNMGKQMPQPTFLRKKLVFSPDSAGSGEGRSLLTCGDVEENPGPSRMGTSLLCWMALCLLGD  
HADACPYSNPSLCSGGGGSELPTQGTFSNVSTNVSPAKPTTACPYSNPSLCSGGGGSPAPRPPTPAPTIASQPLSLRPE  
ACRPAAGGAVHTRGLDFACDIYIWAPLAGTCGVLLLSLVITLYCNHRNRRRVCKCRPVV\*
