# Supplementary material for: Combinatorial suicide gene strategies for the safety of cell therapies
Source: PubMed Central journal article supplement (PMC9515659; doi:10.3389/fimmu.2022.975233), 2022-09-14

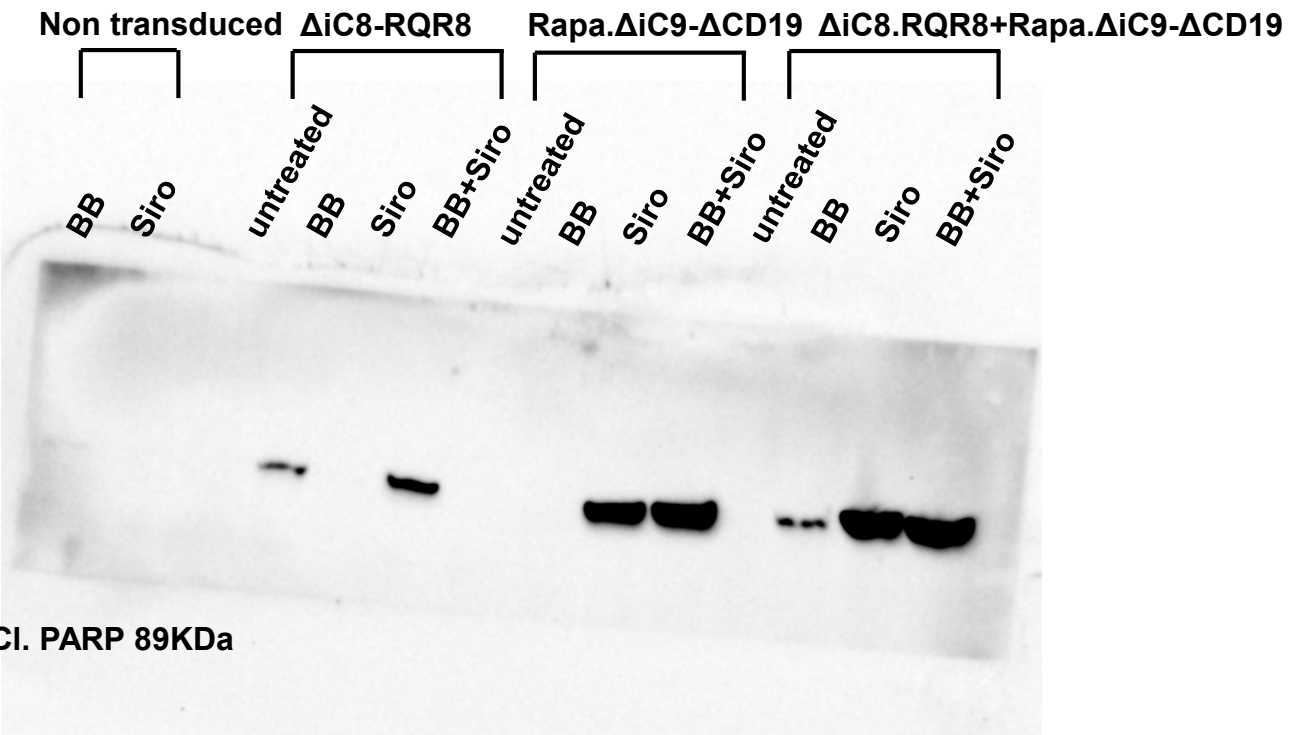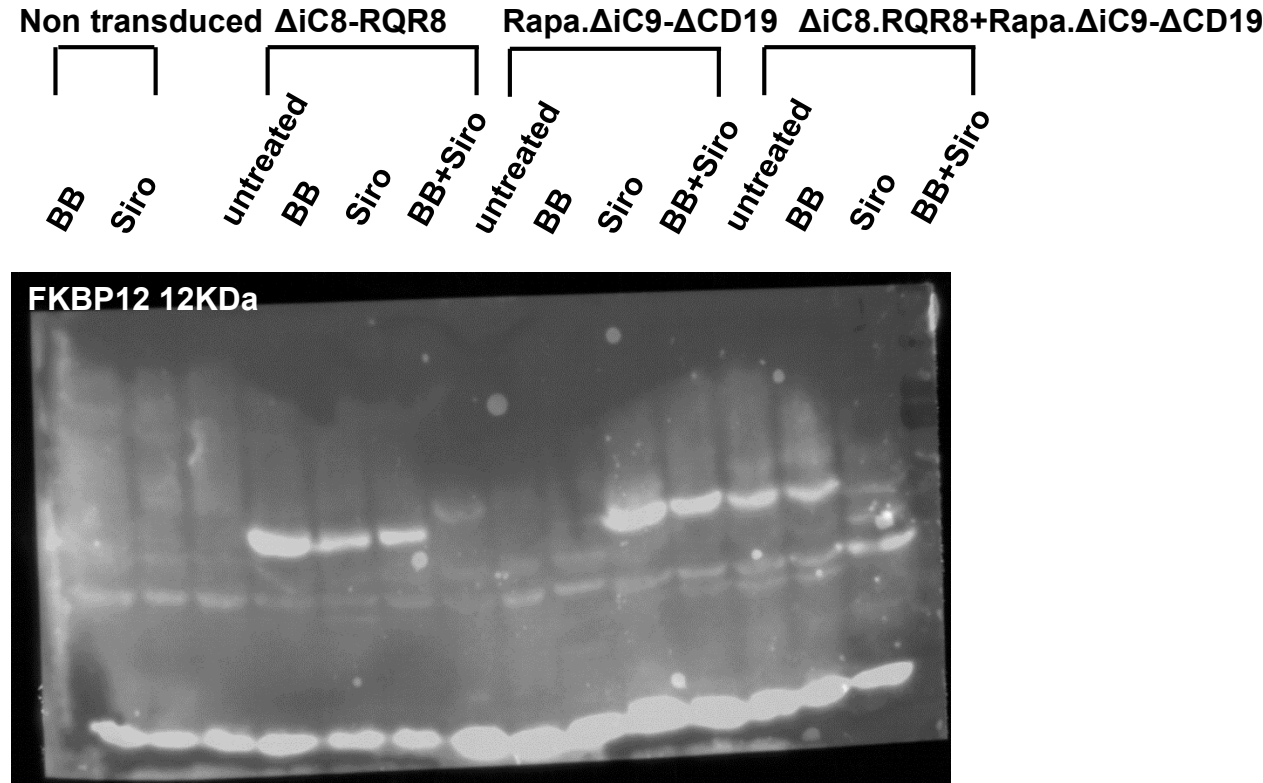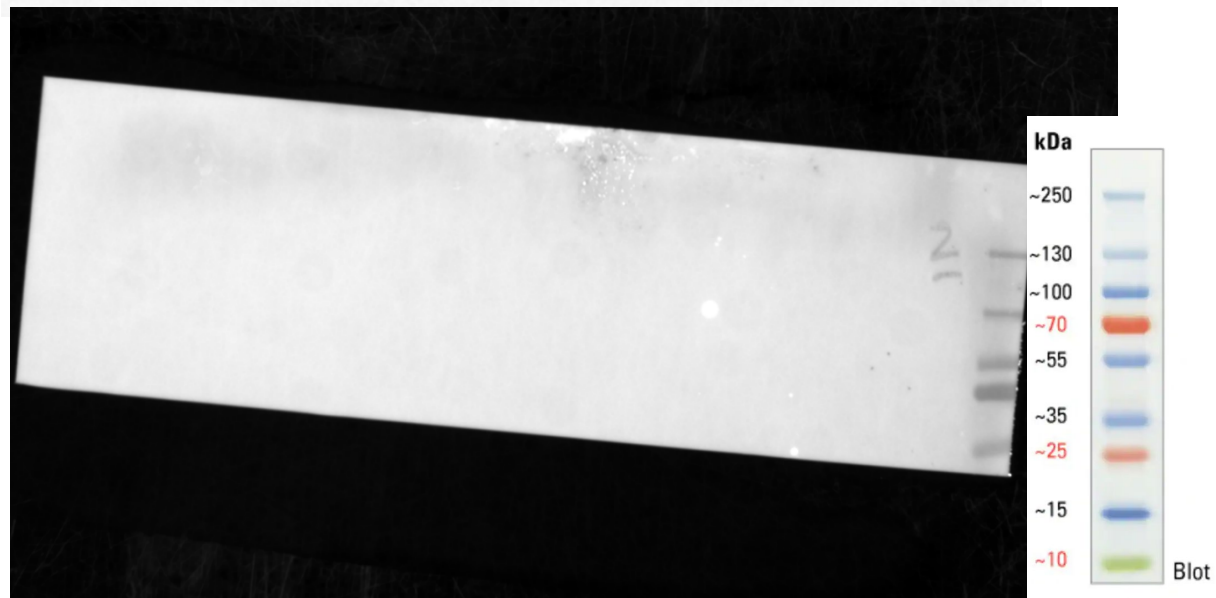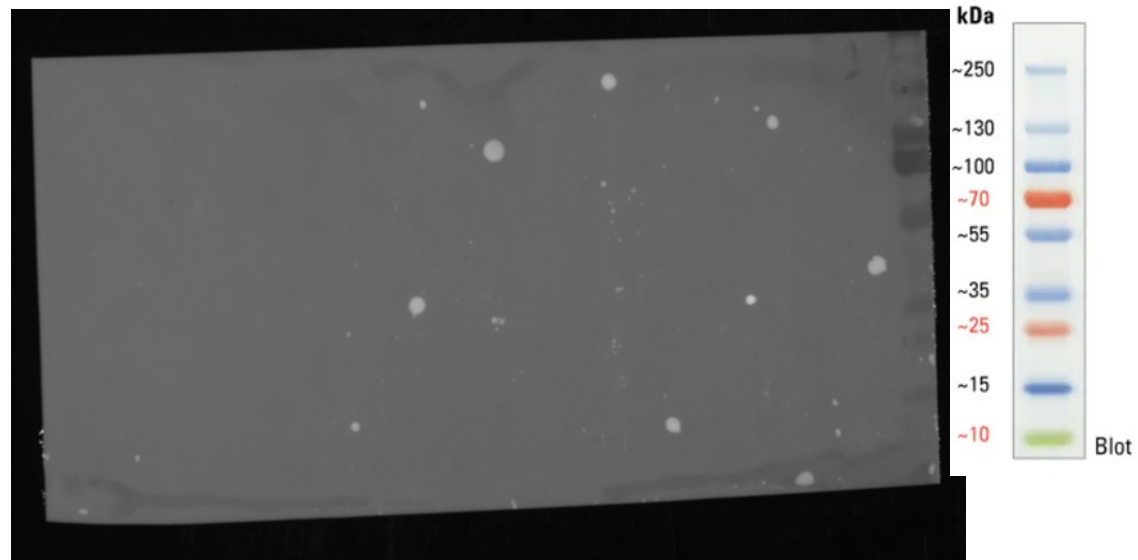

Supplement: DataSheet_2.pdf [file DataSheet_2.pdf]
