# Supplementary material for: Combinatorial suicide gene strategies for the safety of cell therapies
Source: PubMed Central journal article supplement (PMC9515659; doi:10.3389/fimmu.2022.975233), 2022-09-14
Supplement: Table_1.pdf [file Table_1.pdf]

**Supplemental Table 1: Percentage of killing values for single experiments of Figure 1**

| <b>NT</b> | <b><math>\Delta</math>iC8-GFP</b> | <b><math>\Delta</math>iC9-<math>\Delta</math>CD19</b> | <b><math>\Delta</math>iC8-GFP/<math>\Delta</math>iC9-<math>\Delta</math>CD19</b> |
|-----------|-----------------------------------|-------------------------------------------------------|----------------------------------------------------------------------------------|
| 0.00      | 74.89                             | 82.36                                                 | 95.89                                                                            |
| 0.00      | 78.51                             | 78.51                                                 | 94.43                                                                            |
| 0.00      | 73.00                             | 76.86                                                 | 96.20                                                                            |
| 3.48      | 22.33                             | 56.27                                                 | 94.16                                                                            |
| 0.00      | 46.71                             | 77.22                                                 | 92.70                                                                            |
|           | 84.43                             | 65.88                                                 | 91.95                                                                            |
|           | 81.98                             | 80.25                                                 | 96.58                                                                            |

NT: non transduced.
