# Supplementary material for: Combinatorial suicide gene strategies for the safety of cell therapies
Source: PubMed Central journal article supplement (PMC9515659; doi:10.3389/fimmu.2022.975233), 2022-09-14
Supplement: Table_2.pdf [file Table_2.pdf]

**Supplemental Table 2: Percentage of killing values for single experiments of Figure 3**

| NT<br>untx | NT<br>BB | NT<br>Siro | NT<br>BB+Siro | $\Delta$ iC8-<br>RQR8<br>untx | $\Delta$ iC8-<br>RQR8<br>BB | $\Delta$ iC8-<br>RQR8Siro | $\Delta$ iC8-<br>RQR8<br>BB+Siro | Rapa $\Delta$ iC9<br>untx | Rapa $\Delta$ iC9<br>BB | Rapa $\Delta$ iC9<br>Siro | Rapa $\Delta$ iC9<br>BB+Siro | $\Delta$ iC8-<br>RQR8+Rapa-<br>$\Delta$ iC9- $\Delta$ CD19<br>untx | iC8-<br>RQR8+Rapa-<br>iC9 BB | iC8-<br>RQR8+Rapa-<br>iC9 Siro | iC8-<br>RQR8+Rapa-<br>iC9 BB+Siro |
|------------|----------|------------|---------------|-------------------------------|-----------------------------|---------------------------|----------------------------------|---------------------------|-------------------------|---------------------------|------------------------------|--------------------------------------------------------------------|------------------------------|--------------------------------|-----------------------------------|
|            |          |            |               | 1.00                          | 99.90                       |                           | 99.90                            |                           |                         |                           |                              | 1.00                                                               | 99.30                        |                                | 99.70                             |
|            |          |            |               | 1.00                          | 99.70                       |                           | 99.10                            |                           |                         |                           |                              | 1.00                                                               | 99.50                        |                                | 99.90                             |
|            |          |            |               | 1.00                          | 99.10                       | 3.00                      | 99.40                            |                           |                         |                           |                              | 1.00                                                               | 96.60                        | 99.60                          | 100.00                            |
|            |          |            |               |                               |                             |                           |                                  |                           |                         |                           |                              | 1.00                                                               | 96.50                        | 99.20                          | 99.40                             |
| 1          | 22.30    | 20.90      | 28.00         | 1.00                          | 97.60                       | 26.20                     | 98.40                            | 1.00                      | 32.50                   | 92.40                     | 93.20                        | 1.00                                                               | 99.10                        | 78.70                          | 99.90                             |
| 1          | 16.90    | 25.60      | 30.50         | 1.00                          | 98.40                       | 39.50                     | 99.00                            | 1.00                      | 38.30                   | 97.70                     | 95.20                        | 1.00                                                               | 99.40                        | 83.20                          | 99.90                             |
| 1          | 17.80    | 0.00       | 7.00          | 1.00                          | 84.90                       | 1.40                      | 91.40                            | 1.00                      | 20.50                   | 51.40                     | 60.70                        | 1.00                                                               | 91.90                        | 69.70                          | 96.00                             |

NT: non transduced; untx: untreated
