# Supplementary material for: Combinatorial suicide gene strategies for the safety of cell therapies
Source: PubMed Central journal article supplement (PMC9515659; doi:10.3389/fimmu.2022.975233), 2022-09-14
Supplement: Table_3.pdf [file Table_3.pdf]

**Supplemental Table 3: Percentage of killing values for single experiments of Figure 6**

|                     | NT    |      |       | RQR8-I-GFP |       |       |       | iC9-2A-RQR8-I-GFP |       |       |       |
|---------------------|-------|------|-------|------------|-------|-------|-------|-------------------|-------|-------|-------|
| <b>Untx</b>         |       |      |       |            |       |       |       |                   |       |       |       |
| <b>BB</b>           | 2.00  | 6.00 | 1.10  | 0.00       | 0.00  | 0.00  | 0.00  | 99.40             | 99.40 | 96.30 | 99.70 |
| <b>Rituxan</b>      | 28.60 | 1.00 | 20.80 | 97.40      | 73.00 | 99.00 | 73.00 | 91.40             | 91.40 | 69.00 |       |
| <b>BB + Rituxan</b> | 0.20  | 2.40 | 0.00  | 99.00      | 74.80 | 99.20 | 74.00 | 99.20             | 99.20 | 96.50 | 99.90 |

NT: non transduced, Untx: untreated
